# Supplementary material for: Wave exposure shapes reef community composition and recovery trajectories at a remote coral atoll
Source: Springer Nature journal article supplement (doi:10.1007/s00338-021-02184-w), 2021-09-27
Supplement: MOESM1 [file 338_2021_2184_moesm1_esm.pdf]

# Wave exposure shapes reef community composition and recovery trajectories at a remote coral atoll

*Coral Reefs* - Electronic Supplementary Material

Ines D Lange<sup>1,\*</sup>, Cassandra E Benkwitt, Jamie M McDevitt-Irwin, Kristina L Tietjen, Brett Taylor, Mark Chinkin, Rachel L Gunn, Melissa Palmisciano, Margaux Steyaert, Bry Wilson, Holly K East, John Turner, Nicholas A J Graham, Chris T Perry

<sup>1</sup> Geography, College of Life and Environmental Sciences, University of Exeter, Exeter EX4 4RJ, UK  
[\\*i.lange@exeter.ac.uk](mailto:i.lange@exeter.ac.uk)

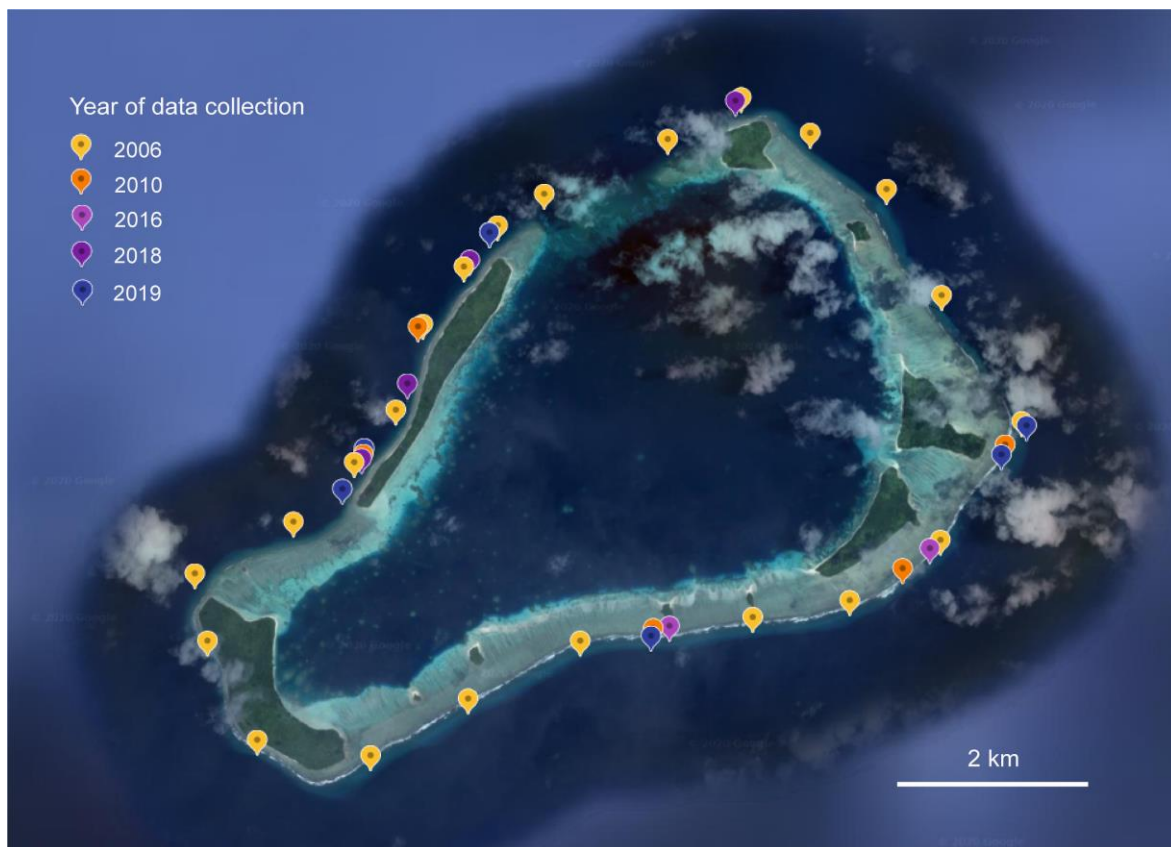

**ESM 1: Locations of surveyed sites around Salomon atoll** in 2006 (yellow; this study), 2010 (orange; Graham et al. 2013), 2016 (light purple; Head et al. 2019), 2018 (dark purple; Lange and Perry 2019) and 2019 (blue; Lange, unpublished data and Benkwitt and Graham, unpublished data). Satellite image: Google Earth V9.123.0.1. Salomon atoll 5°20'02''S 72°14'25''E, Camera altitude 23 km [earth.google.com/web/](http://earth.google.com/web/) [18 December 2020]

## References

- Graham NA, Pratchett MS, McClanahan TR, Wilson SK (2013) The status of coral reef fish assemblages in the Chagos Archipelago, with implications for protected area management and climate change *Coral reefs of the United Kingdom overseas territories*. Springer, pp.253-270
- Head CE, Bayley DT, Rowlands G, Roche RC, Tickler DM, Rogers AD, Koldewey H, Turner JR, Andradi-Brown DA (2019) Coral bleaching impacts from back-to-back 2015–2016 thermal anomalies in the remote central Indian Ocean. *Coral Reefs* 38:605-618
- Lange ID, Perry CT (2019) Bleaching impacts on carbonate production in the Chagos Archipelago: influence of functional coral groups on carbonate budget trajectories *Coral Reefs* 38:619-624

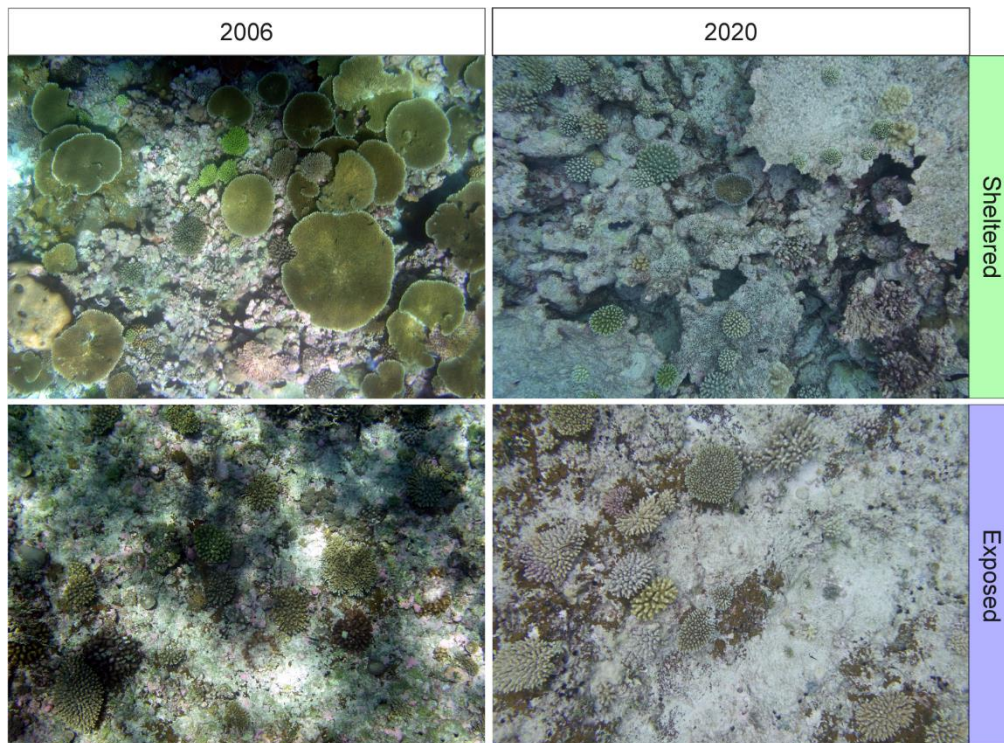

**ESM 2: Representative photographs of benthic communities on fore reefs around Salomon atoll in 2006 and 2020 at sheltered and exposed sites. Note that 2006 photographs were taken from slightly larger distances to the reef but in similar water depth (6-8 m).**

**ESM 3: Statistical analysis output tables for 2020 community analysis**

PERMDISP cluster groups at SIMPROF p=0.001 – 2 groups (betadisper)

| Response: | Df | Sum Sq   | Mean Sq   | F value | Pr(>F) |
|-----------|----|----------|-----------|---------|--------|
| Groups    | 1  | 0.004712 | 0.0047119 | 1.4202  | 0.2467 |
| Residuals | 21 | 0.069672 | 0.0033177 |         |        |

PERMANOVA (adonis)

Permutation: free

Number of permutations: 999

|           | Df | SumsOfSqs | MeanSqs | F.Model | R2      | Pr(>F)    |
|-----------|----|-----------|---------|---------|---------|-----------|
| Exposure  | 1  | 0.44664   | 0.44664 | 18.949  | 0.47433 | 0.001 *** |
| Residuals | 21 | 0.49497   | 0.02357 |         | 0.52567 |           |
| Total     | 22 | 0.94161   |         |         | 1.00000 |           |

PERMDISP cluster groups at SIMPROF p=0.05 – 6 groups (betadisper)

| Response: | Df | Sum Sq   | Mean Sq   | F value | Pr(>F)  |
|-----------|----|----------|-----------|---------|---------|
| Groups    | 5  | 0.016652 | 0.0033304 | 2.5419  | 0.06813 |
| Residuals | 17 | 0.022273 | 0.0013102 |         |         |

PERMANOVA (adonis)

Permutation: free

Number of permutations: 999

|           | Df | SumsOfSqs | MeanSqs  | F.Model | R2      | Pr(>F)    |
|-----------|----|-----------|----------|---------|---------|-----------|
| SIMPROF   | 5  | 0.73514   | 0.147028 | 12.106  | 0.78073 | 0.001 *** |
| Residuals | 17 | 0.20647   | 0.012145 |         | 0.21927 |           |
| Total     | 22 | 0.94161   |          |         | 1.00000 |           |

|               |                                                                   |   |
|---------------|-------------------------------------------------------------------|---|
| PCA           | square root transformed cover data, Bray-Curtis similarity matrix |   |
|               | Inertia Proportion                                                |   |
| Total         | 13                                                                | 1 |
| Unconstrained | 13                                                                | 1 |

Eigenvalues, and their contribution to the correlations

Importance of components:

|                       | PC1    | PC2    | PC3    | PC4     |
|-----------------------|--------|--------|--------|---------|
| Eigenvalue            | 5.4404 | 2.1087 | 1.3608 | 1.03926 |
| Proportion Explained  | 0.4185 | 0.1622 | 0.1047 | 0.07994 |
| Cumulative Proportion | 0.4185 | 0.5807 | 0.6854 | 0.76532 |

Scaling 2 for species and site scores

\* Species are scaled proportional to eigenvalues

\* Sites are unscaled: weighted dispersion equal on all dimensions

\* General scaling constant of scores: 4.112364

Species driving community composition differences (envfit)

|                            | PC1      | PC2      | r2     | Pr(>r)    |
|----------------------------|----------|----------|--------|-----------|
| <i>Acropora</i> branching  | 0.40190  | 0.91569  | 0.5394 | 0.003 **  |
| <i>Acropora</i> table      | -0.31830 | 0.94799  | 0.3035 | 0.026 *   |
| All encrusting             | -0.98099 | 0.19404  | 0.7720 | 0.001 *** |
| Other massive              | -0.87447 | 0.48508  | 0.6268 | 0.001 *** |
| <i>Porites</i> massive     | -0.94605 | -0.32403 | 0.6102 | 0.001 *** |
| Soft corals                | -0.93884 | -0.34436 | 0.4932 | 0.002 **  |
| Sponges                    | 0.68825  | 0.72547  | 0.5418 | 0.001 *** |
| Sand                       | 0.64479  | -0.76436 | 0.4186 | 0.004 **  |
| Dead <i>Acropora</i> table | -0.99807 | -0.06203 | 0.5881 | 0.001 *** |
| Pavement                   | 0.86051  | -0.50943 | 0.8008 | 0.001 *** |
| Rubble                     | -0.99646 | -0.08412 | 0.7722 | 0.001 *** |
| Other branching            | 0.31268  | 0.94986  | 0.1697 | 0.176     |
| Macroalgae                 | 0.80453  | 0.59391  | 0.3651 | 0.011 *   |

Post-hoc addition of wave exposure in  $J\ m^{-3}$  (continuous variable) as explanatory variable (envfit)

|               | PC1      | PC2      | r2     | Pr(>r)    |
|---------------|----------|----------|--------|-----------|
| Wave exposure | 0.996500 | 0.083593 | 0.9207 | 0.001 *** |

Signif. codes: 0 '\*\*\*' 0.001 '\*\*' 0.01 '\*' 0.05 '.' 0.1 ' ' 1

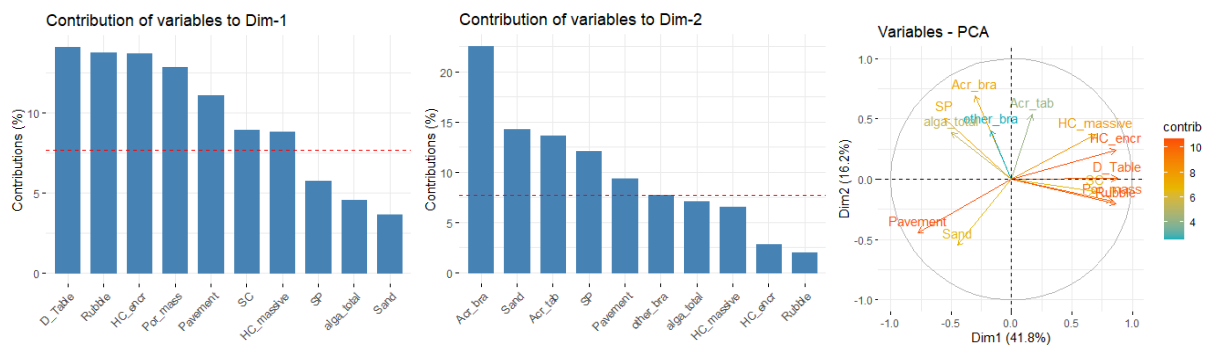

**ESM 4: Contribution of species variables to grouping of community compositions at 23 fore reef sites around Salomon atoll**

**ESM 5: Statistical analysis output tables for 2006 and 2006-2020 analysis**

PERMDISP 2006 comparing sheltered and exposed sites (betadisper)

Response: Distances

|           | Df | Sum Sq  | Mean Sq   | F value | Pr(>F) |
|-----------|----|---------|-----------|---------|--------|
| Groups    | 1  | 0.00975 | 0.0097491 | 0.5897  | 0.4515 |
| Residuals | 20 | 0.33067 | 0.0165336 |         |        |

## PERMANOVA (adonis)

Permutation: free

Number of permutations: 999

|           | Df | SumsOfSqs | MeanSqs | F.Model | R2      | Pr(>F)   |
|-----------|----|-----------|---------|---------|---------|----------|
| Exposure  | 1  | 0.52602   | 0.52602 | 4.7929  | 0.19332 | 0.002 ** |
| Residuals | 20 | 2.19501   | 0.10975 |         | 0.80668 |          |
| Total     | 21 | 2.72104   |         |         | 1.00000 |          |

---

## PERMDISP sheltered sites comparing 2006 and 2020 (betadisper)

Response: Distances

|           | Df | Sum Sq  | Mean Sq | F value | Pr(>F)      |
|-----------|----|---------|---------|---------|-------------|
| Groups    | 1  | 0.13792 | 0.13792 | 9.1764  | 0.006625 ** |
| Residuals | 20 | 0.30059 | 0.01503 |         |             |

## PERMANOVA (adonis)

Permutation: free

Number of permutations: 999

|           | Df | SumsOfSqs | MeanSqs | F.Model | R2      | Pr(>F)    |
|-----------|----|-----------|---------|---------|---------|-----------|
| Year      | 1  | 0.65434   | 0.65434 | 7.8319  | 0.2814  | 0.001 *** |
| Residuals | 20 | 1.67097   | 0.08355 |         | 0.7186  |           |
| Total     | 21 | 2.32531   |         |         | 1.00000 |           |

---

## PERMDISP exposed sites comparing 2006 and 2020 (betadisper)

Response: Distances

|           | Df | Sum Sq  | Mean Sq  | F value | Pr(>F)       |
|-----------|----|---------|----------|---------|--------------|
| Groups    | 1  | 0.11846 | 0.118455 | 24.414  | 6.89e-05 *** |
| Residuals | 21 | 0.10189 | 0.004852 |         |              |

## PERMANOVA (adonis)

Permutation: free

Number of permutations: 999

|           | Df | SumsOfSqs | MeanSqs | F.Model | R2      | Pr(>F)    |
|-----------|----|-----------|---------|---------|---------|-----------|
| Year      | 1  | 0.36591   | 0.36591 | 7.5407  | 0.26421 | 0.001 *** |
| Residuals | 21 | 1.01901   | 0.04852 |         | 0.73579 |           |
| Total     | 22 | 1.38492   |         |         | 1.00000 |           |

---
